# Supplementary material
Source: PubMed Central journal article supplement (PMC5052552)
Supplement: ACI-07-0817-s002.pdf [file ACI-07-0817-s002.pdf]

<http://dx.doi.org/10.4338/ACI-2016-04-RA-0058>

### Supplement B. Example OpenInfobutton resource profile.

The following is an example, annotated, XML used to configure a resource in the LITE interface. The example provides for matching a request containing specific OMIM codes, ClinGen as the requesting organization, and problem list entry or review as the context with an API request from the Genetics Home Reference.

```
<?xml version="1.0" encoding="UTF-8"?>
<knowledgeResourceProfile xmlns:xsi="http://www.w3.org/2001/XMLSchema-instance"
  xsi:noNamespaceSchemaLocation="../../../TailoringTool/ResourceProfile-v2.9_LITE.xsd">
  <header id="1">
    <title>Genetics Home Reference</title>
    <profileDescription>Information on genetic conditions.</profileDescription>
    <versionControl publicationDate="2011-10-24T00:00:00"/>
  </header>
  <profileDefinition hl7URLCompliant="false" hl7KnowledgeResponseCompliant="false"
    urlStyle="DIRTY"> !— indicates HL7 compliance and style of URL for API request-->
    <authorizedOrganizations>
      <!--organizations which will be matched. Only these will receive a response form the resource-->
      <authorizedOrganization id="clinicalgenome.org" name="ClinGen"/>
    </authorizedOrganizations>
    <contexts> <!--each context contains instructions for matching the request parameters and
instructions for using the request parameters in an API request from the resoruce-->
      <context name="Access to condition modules from problem list review and entry. " id="1">
        <contextDefinition>
          <task match="true" search="false">
```

```

<!--the task to be matched-->
    <matchingDomain>
        <enumeration includeDescendants="false">
            <code codeSystem="2.16.840.1.113883.5.4" displayName="problem list review
task" code="PROBLISTREV"/> <!--match problem list review-->
            <code codeSystem="2.16.840.1.113883.5.4" displayName="problem list entry
task" code="PROBLISTE"/> <!--match problem list entry-->
        </enumeration>
    </matchingDomain>
</task>
<conceptOfInterest match="true" search="true"> <!--main search criteria-->
    <matchingDomain>
        <externalValueSet id="OMIM_GENETIC_CONDITIONS"
name="OMIM_GENETIC_CONDITIONS"/> <!--we restricted the OMIM codes which code be
matched. If an incoming OMIM code is not in the list the profile is not matched-->
    </matchingDomain>
    <searchParameter source="displayName">
        <syntaxOnResource nonHI7CompliantName="query"/>
<!--instruction that the OMIM code display name should be sent to API as the parameter 'query'-->
    </searchParameter>
</conceptOfInterest>
<subTopics>
    <subTopic linkName="Genetic conditions"/>
<!--name for the link as it will appear in the response-->
</subTopics>

```

</contextDefinition>

<knowledgeRequestService>

<knowledgeRequestServiceLocation url="http://ghr.nlm.nih.gov/search?"/>

<!--domain for the API request to be used. Precedes parameter names-->

</knowledgeRequestService>

</context>

</contexts>

</profileDefinition>

</knowledgeResourceProfile>
